# Supplementary material for: RNA G-quadruplexes: emerging mechanisms in disease
Source: PubMed Central journal article supplement — Nucleic Acids Res. 2016 Dec 24;45(4):1584–95. doi: 10.1093/nar/gkw1280 (PMC5389700; doi:10.1093/nar/gkw1280), 2016-12-24
Supplement: gkw1280_Supp.pdf [file gkw1280_Supp.pdf]

SUPPLEMENTARY DATA

**RNA G-quadruplexes: emerging mechanisms in disease**

Anne Cammas and Stefania Millevoi

Supplementary Table 1. **Functional RNA G4s and the associated mechanisms in health and disease.**

| RNA G-QUADRUPLEXES |                                                  |                                                |          |                       |                                                                                                            |       |                                                 |       |
|--------------------|--------------------------------------------------|------------------------------------------------|----------|-----------------------|------------------------------------------------------------------------------------------------------------|-------|-------------------------------------------------|-------|
| Gene Code (HGNC)   | Gene description                                 | Gene-disease association                       | Position | Function              | Methods                                                                                                    | RBP   | G4-associated biological process                | Ref.  |
| NRAS               | Neuroblastoma RAS Viral (V-Ras) Oncogene Homolog | Cancer                                         | 5' UTR   | Translation repressor | -Reporter ( <i>in vitro</i> )<br>-UV, CD                                                                   | N.D.  | N.D.                                            | (1,2) |
| ESR1               | Estrogen Receptor Alpha                          | Breast Cancer, Osteoporosis, Alzheimer         | 5' UTR   | Translation repressor | -Reporter ( <i>in vitro</i> )<br>-UV, CD                                                                   | N.D.  | N.D.                                            | (3)   |
|                    |                                                  |                                                | ORF      |                       | -Reporter ( <i>in vitro/in cellulo</i> )<br>-UV, CD, native PAGE                                           | N.D.  |                                                 | (4)   |
| ZIC1               | Zic family member 1                              | Medulloblastoma                                | 5' UTR   | Translation repressor | -Reporter ( <i>in cellulo</i> )<br>-UV, CD                                                                 | N.D.  | N.D.                                            | (5)   |
| BCL2               | B-cell CLL/lymphoma 2                            | Cancer, B-cell lymphomas, Alzheimer, Parkinson | 5' UTR   | Translation repressor | -Reporter ( <i>in vitro/in cellulo</i> )<br>-UV, CD                                                        | N.D.  | N.D.                                            | (6)   |
| TERF2              | Telomeric repeat binding factor 2                | Werner syndrome                                | 5' UTR   | Translation repressor | -Reporter ( <i>in vitro/in cellulo</i> )<br>-UV and CD, native PAGE<br>-G4 ligand 360A, Phen-DC3, Phen-DC6 | N.D.  | N.D.                                            | (7)   |
| MT3-MMP            | Matrix metalloproteinase 16                      | Gastric, Prostate cancer, Osteochondrosis      | 5' UTR   | Translation repressor | -Reporter ( <i>in cellulo</i> )<br>-CD, RNase T1 footprinting<br>-G4 ligand TMPyP4                         | N.D.  | N.D.                                            | (8,9) |
| ADAM10             | ADAM metalloproteinase domain 10                 | Alzheimer, Cancer                              | 5' UTR   | Translation repressor | -Reporter ( <i>in vitro/in cellulo</i> )<br>-CD                                                            | N.D.  | N.D.                                            | (10)  |
|                    |                                                  |                                                |          | Translation repressor | -Reporter ( <i>in cellulo</i> )<br>-CD                                                                     | eIF4A | T-cell acute lymphoblastic leukemia development | (11)  |
| CCND3              | Cyclin D3                                        | Cancer, B-cell lymphomas                       | 5' UTR   | Translation repressor | -Reporter ( <i>in cellulo</i> )<br>-CD, RNase T1 footprinting                                              | N.D.  | Cell cycle distribution and proliferation       | (12)  |
| AKTIP              | AKT interacting protein                          | Tenosynovitis thymic hyperplasia               | 5' UTR   | Translation repressor | -Reporter ( <i>in vitro</i> )<br>-UV, CD                                                                   | N.D.  | N.D.                                            | (13)  |
| CTSB               | Cathepsin B                                      | Alzheimer, Cancer                              |          |                       |                                                                                                            |       | N.D.                                            |       |
| FOXE3              | Forkhead box E3                                  | Congenital aphakia                             | 5' UTR   | Translation activator | -Reporter ( <i>in vitro</i> )<br>-UV, CD                                                                   | N.D.  | N.D.                                            | (13)  |

|               |                                                  |                                                          |                      |                                                                                             |                                                                                                                                                                 |                                                              |                                                                                         |      |
|---------------|--------------------------------------------------|----------------------------------------------------------|----------------------|---------------------------------------------------------------------------------------------|-----------------------------------------------------------------------------------------------------------------------------------------------------------------|--------------------------------------------------------------|-----------------------------------------------------------------------------------------|------|
| PIM1          | Pim-1 proto-oncogene, serine/threonine kinase    | Alpha antitrypsin deficiency, Cancer                     | 1- 3' UTR            | Translation repressor                                                                       | -Reporter ( <i>in cellulo</i> )<br>-UV, CD                                                                                                                      | N.D.                                                         | N.D.                                                                                    | (14) |
| FGF2          | Fibroblast growth factor 2                       | Cancer, Vascular disease                                 | 5' UTR (IRES)        | Translation activator                                                                       | -Reporter ( <i>in cellulo</i> )<br>-Enzymatic and chemical probing, primer extension                                                                            | N.D.                                                         | N.D.                                                                                    | (15) |
| VEGFA         | Vascular endothelial growth factor A             | Cancer, Diabetic retinopathy                             | 5' UTR (IRES)        | Translation activator                                                                       | -Reporter ( <i>in vitro/in cellulo</i> )<br>-CD, RNase T1, DMS footprinting                                                                                     | N.D.                                                         | N.D.                                                                                    | (16) |
|               |                                                  |                                                          |                      | Translation repressor                                                                       | -Reporter ( <i>in vitro/in cellulo</i> )<br>-VEGF expression, polysomal analysis of endogenous mRNA<br>-Primer extension<br>-G4 ligand 360A, Phen-DC3, Phen-DC6 | N.D.                                                         | Endogenous VEGF secretion                                                               | (17) |
| TGFB2         | Transforming growth factor beta 2                | Cancer, Kidney/lung disease                              | 5' UTR               | Translation activator                                                                       | -Reporter ( <i>in cellulo</i> )<br>-CD, RNase T1 footprinting<br>-G4 ligand TMPyP4                                                                              | N.D.                                                         | N.D.                                                                                    | (18) |
| PP2Ac         | Protein phosphatase 2A catalytic subunit         | Cancer, Alzheimer                                        | 5' UTR               | Translation repressor                                                                       | -Primer extension<br>-EMSA                                                                                                                                      | FMRP                                                         | FMRP controls actin cytoskeleton remodeling through regulation of PP2Ac expression      | (19) |
| FMR1          | Fragile X mental retardation 1                   | FXS, FXTAS, Premature ovarian failure, Autistic disorder | 5' UTR               | Translation repressor                                                                       | -Reporter ( <i>in vitro/in cellulo</i> )<br>-RNase T1 , Native PAGE                                                                                             | hnRNP A2<br>CBF-A                                            | hnRNP A2 and CBF-A enhance the <i>in vivo</i> translation of fragile X premutation mRNA | (20) |
|               |                                                  |                                                          | ORF                  | Translation repressor                                                                       | -Reporter harbouring the G4 in the 5'UTR ( <i>in vitro</i> )<br>-Primer extension, DMS footprinting                                                             | FMRP                                                         | N.D.                                                                                    | (21) |
|               |                                                  |                                                          | Alternative splicing | -Reporter and endogenous mRNA expression ( <i>in cellulo/in vivo</i> )<br>-Primer extension | FMRP                                                                                                                                                            | FMRP controls its own splicing at exon 15                    | (22)                                                                                    |      |
| PSD-95 (DLG4) | Discs large homolog 4                            | FXS, Alzheimer, Schizophrenia                            | 3' UTR               | mRNA localization                                                                           | -Reporter ( <i>in cellulo</i> )<br>-Enzymatic and chemical probing, primer extension                                                                            | FMRP                                                         | FMRP-mediated neurite mRNA targeting                                                    | (23) |
|               |                                                  |                                                          |                      | Access of miR-125a to the PSD-95 mRNA                                                       | -UV,CD, fluorescence, NMR, native PAGE                                                                                                                          | Translational regulation of PSD-95 by FMRP and miR-125a (24) |                                                                                         | (25) |
| NR2B          | N-methyl-D-aspartate (NMDA) Receptor subunit B   | FXS, Schizophrenia , Alzheimer                           | 3' UTR               | Translation repressor (26)                                                                  | -UV,CD, fluorescence, NMR, native PAGE<br>-EMSA                                                                                                                 | FMRP                                                         | FMRP-mediated control of "local" mRNA translation in neurons (27)                       | (28) |
| SHANK1        | SH3 and multiple ankyrin repeat domains proteins | FXS, Autistic disorder                                   | 3' UTR               | Translation repressor (26)                                                                  | -UV,CD, fluorescence, NMR spectroscopy, native PAGE<br>-RNA-pull down                                                                                           | FMRP                                                         | FMRP-mediated control of "local" mRNA translation in neurons (27)                       | (29) |
| MAP1B         | Microtubule associated protein 1B                | FXS, Werdnig-Hoffmann disease                            | 5' UTR               | Translation repressor (26)                                                                  | -UV,CD, fluorescence, NMR, native PAGE<br>-EMSA                                                                                                                 | FMRP                                                         | Microtubule stability in brain neuron development (30,31).                              | (32) |

|                                |                                                    |                                                |          |                             |                                                                                                                                   |                                            |                                                                                       |      |
|--------------------------------|----------------------------------------------------|------------------------------------------------|----------|-----------------------------|-----------------------------------------------------------------------------------------------------------------------------------|--------------------------------------------|---------------------------------------------------------------------------------------|------|
| SEMA3F                         | Semaphorin 3F                                      | FXS                                            | 3' UTR   | Translation repressor (26)  | -UV,CD, fluorescence, NMR, native PAGE                                                                                            | FMRP                                       | FMRP-mediated control of "local" mRNA translation in neurons (27)                     | (33) |
| APP                            | Amyloid beta precursor protein                     | Cancer, Alzheimer, FXS                         | ORF      | Translation repressor       | -RIP-RNaseT1, CLIP                                                                                                                | FMRP                                       | FMRP-mediated control of "local" mRNA translation in neurons (27)                     | (34) |
| YY1                            | YY1 transcription factor                           | Cancer                                         | 5' UTR   | Translation repressor       | -Reporter ( <i>in cellulo</i> )<br>-CD, DMS footprinting                                                                          | N.D.                                       | N.D.                                                                                  | (35) |
| PITX1                          | Paired like homeodomain 1                          | Club foot                                      | 3' UTR   | Translation                 | -Reporter ( <i>in cellulo</i> )<br>-Native PAGE<br>-RNA-pull down, EMSA                                                           | RHAU                                       | N.D.                                                                                  | (36) |
| MST1R                          | Macrophage stimulating 1 receptor                  | Cancer                                         | 5' UTR   | Translation repressor       | -Reporter ( <i>in vitro/in cellulo</i> )<br>-Primer extension<br>-G4 ligand Phen-DC3, Phen-DC6                                    | hnRNP A1                                   | -Cell invasion, migration<br>-Breast cancer                                           | (37) |
| MLL1<br>MLL4                   | Mixed-Lineage Leukemia 1, Mixed-Lineage Leukemia 4 | Leukemia                                       | ORF      | Translation repressor       | -Reporter ( <i>in cellulo</i> )<br>-Polysome analysis<br>-RNA-pull down, CLIP<br>-In-line probing                                 | Aven<br>RHAU                               | Survival of leukemic cells                                                            | (38) |
| Nkx2-5                         | NK2 homeobox 5                                     | Congenital heart disease                       | 5' UTR   | Translation repressor       | -Reporter ( <i>in cellulo</i> )<br>-RNA-pull down, IP                                                                             | RHAU                                       | Post-transcriptional regulation of Nkx2-5 during heart development                    | (39) |
| C9orf72<br>r(GGGGC)<br>C)n RNA | Chromosome 9 open reading frame 72                 | ALS, FTD                                       | Intron 1 | RBP sequestration           | -G4 ligand: TMPyP4<br>-UV,CD, native PAGE<br>-EMSA                                                                                | hnRNP A1<br>ASF/SF2                        | Role of RBPs in toxic RNA pathways                                                    | (40) |
|                                |                                                    |                                                |          | RBP sequestration           | -Native PAGE, CD<br>-EMSA                                                                                                         | ASF/SF2                                    | G4-mediated RNA-RNA interactions influence the formation of toxic RNA foci            | (41) |
|                                |                                                    |                                                |          | RBP sequestration           | -Native PAGE, CD, RNase T1<br>-RNA-pull down                                                                                      | Nucleolin                                  | -Defective nucleolar function and perturbation in protein homeostasis                 | (42) |
|                                |                                                    |                                                |          | RBP sequestration           | -RNA foci: FISH, IF<br>-RNA-pull down                                                                                             | hnRNP H                                    | Neuronal apoptotic cell death                                                         | (43) |
|                                |                                                    |                                                |          | RBP sequestration           | -RNA foci: FISH, IF<br>-RNA-pull down                                                                                             | ASF/SF2<br>hnRNP H/F<br>ALYREF<br>hnRNP A1 | Toxic RNA foci formation possibly impacting RNA homeostasis through RBP sequestration | (44) |
|                                |                                                    |                                                |          | mRNA transport              | -RNA-pull down<br>-Effect of TMPyP4 on nuclear import defects and on neurodegeneration                                            | RanGAP                                     | -Nuclear pore complex defects<br>-Developmental defects                               | (45) |
|                                |                                                    |                                                |          | Translation Repression (46) | -Fluorescence, native PAGE<br>-RNA-pull down<br>-IF (SG formation)<br>-Reporter ( <i>in vitro</i> )<br>-G-rich oligo transfection | YB1                                        | Cytoprotective and prosurvival functions (46)                                         | (47) |
| BCL2, others                   | B-cell CLL/lymphoma 2                              | Cancer, B-cell lymphomas, Alzheimer, Parkinson | 5' UTR   | Translation repressor       | -Reporter ( <i>in cellulo</i> )<br>-CD                                                                                            | eIF4A                                      | T-cell lymphoblastic Leukemia development                                             | (11) |
| IGF2                           | Insulin-like growth factor II                      | Beckwith-Wiedemann, Proteus syndrome,          | 3' UTR   | Pre-mRNA 3' end processing  | -Enzymatic and chemical probing, primer extension, native PAGE                                                                    | N.D.                                       | Post-transcriptional gene expression regulation by endonucleolytic                    | (48) |

|                           |                                                               |                                    |                 |                                        |                                                                                                                           |           |                                                                                                      |      |
|---------------------------|---------------------------------------------------------------|------------------------------------|-----------------|----------------------------------------|---------------------------------------------------------------------------------------------------------------------------|-----------|------------------------------------------------------------------------------------------------------|------|
|                           |                                                               | Cancer                             |                 |                                        |                                                                                                                           |           | cleavage                                                                                             |      |
| TP53                      | Tumor protein TP53                                            | Cancer, Li-Fraumeni syndrome       | Pre-mRNA 3' end | Pre-mRNA 3' end processing             | -Reporter ( <i>in cellulo</i> )<br>-Primer extension<br>-G4 ligand TMPyP4<br>-RNA-pull down, UV crosslinking              | hnRNP H/F | TP53 functions, including apoptosis                                                                  | (49) |
|                           |                                                               |                                    | Intron 3        | Alternative splicing                   | -UV,CD, primer extension<br>-Reporter ( <i>in cellulo</i> )<br>-G4 ligand 360A on endogenous mRNA                         | N.D.      | Production of TP53 isoforms                                                                          | (50) |
| CSB II                    | Conserved Sequence Block II (at mitochondrial DNA)            | -                                  | CSBII           | Transcription termination              | -Reporter ( <i>in vitro</i> )<br>-Effect of 7-deaza-GTP and ionic conditions on transcription termination<br>-Native PAGE | N.D.      | Generation of primers for initiation of mitochondrial DNA replication                                | (51) |
| LRP5                      | Low density lipoprotein receptor-related protein 5            | Osteoporosis-pseudoglioma syndrome | 3' UTR          | Alternative pre-mRNA 3' end processing | -Reporter ( <i>in cellulo</i> / <i>in vitro</i> )<br>-CD, In-line probing                                                 | N.D.      | Regulation of mRNA 3' end length                                                                     | (52) |
| FXR1                      | Fragile X-related mental retardation autosomal homolog 1      | FXS                                |                 |                                        |                                                                                                                           |           |                                                                                                      |      |
| CaMK2a                    | Calcium/calmodulin dependent protein kinase II alpha          | Cancer                             | 3' UTR          | mRNA localization                      | -Reporter ( <i>in cellulo</i> )<br>-Enzymatic, chemical probing, primer extension                                         | FMRP      | FMRP-mediated neurite mRNA targeting                                                                 | (23) |
| BACE1                     | Beta-site APP (A $\beta$ precursor protein) cleaving enzyme 1 | Alzheimer                          | Exon3           | Pre-mRNA Splicing                      | - Reporter and endogenous mRNA expression ( <i>in cellulo</i> )<br>-RNase T1 assay, NMR, CD<br>-EMSA, RNA-pull down       | hnRNP H   | BACE1 splicing regulates amyloid b-protein involved in the pathogenesis of Alzheimer disease         | (53) |
| PAX9                      | Pax homeodomain family of transcription factor                | Tooth agenesis                     | Intron 1        | Pre-mRNA Splicing                      | -Reporter and endogenous expression ( <i>in cellulo</i> )<br>-CD, FRET<br>-G4-ligand 360A                                 | N.D.      | Splicing mechanism that might contribute to the modulation of dentition pattern in placental mammals | (54) |
| Mir-92b                   | miRNA 92b                                                     | Cancer                             | Pre-miR         | MicroRNA maturation                    | -RNase T1, native EMSA, CD, chemical and enzymatic mapping<br>-Reporter ( <i>in vitro/in cellulo</i> )                    | N.D.      | Gene expression regulation through miRNA biogenesis modulation                                       | (55) |
| Immunoglobulin switch RNA | -                                                             | -                                  | N.D.            | DNA recombination                      | -CD, native EMSA<br>-RNA-pull down                                                                                        | AID       | Class-switch recombination                                                                           | (56) |
| EBAG9                     | Estrogen Receptor Binding Site Associated, Antigen, 9         | Cancer                             | 5' UTR          | Translation repressor                  | -Reporter ( <i>in cellulo</i> )<br>-CD<br>-In-line probing                                                                | N.D.      | -                                                                                                    | (57) |
| FZD2                      | Frizzled Class Receptor 2                                     | Omodysplasia                       |                 |                                        |                                                                                                                           |           |                                                                                                      |      |
| BARHL1                    | BarH-Like Homeobox 1                                          | Joubert syndrome                   |                 |                                        |                                                                                                                           |           |                                                                                                      |      |
| NCAM2                     | Neural cell adhesion molecule 1                               | -                                  |                 |                                        |                                                                                                                           |           |                                                                                                      |      |
| THRA                      | Thyroid hormone receptor alpha                                | Hypothyroidism                     |                 |                                        |                                                                                                                           |           |                                                                                                      |      |

|                                                                                                                                                                                                                                                                                                                                                                                                                                                                                                                                                                                                                                             |                                                                                         |                                                                                 |          |                                                                |                                                                                                                                       |             |                                                                                                                 |         |
|---------------------------------------------------------------------------------------------------------------------------------------------------------------------------------------------------------------------------------------------------------------------------------------------------------------------------------------------------------------------------------------------------------------------------------------------------------------------------------------------------------------------------------------------------------------------------------------------------------------------------------------------|-----------------------------------------------------------------------------------------|---------------------------------------------------------------------------------|----------|----------------------------------------------------------------|---------------------------------------------------------------------------------------------------------------------------------------|-------------|-----------------------------------------------------------------------------------------------------------------|---------|
| AASDHP<br>PT                                                                                                                                                                                                                                                                                                                                                                                                                                                                                                                                                                                                                                | Aminoacidpate-<br>semialdehyde<br>dehydrogenase-<br>phosphopantethei<br>nyl transferase | -                                                                               |          |                                                                |                                                                                                                                       |             |                                                                                                                 |         |
| piRNA<br>precursor                                                                                                                                                                                                                                                                                                                                                                                                                                                                                                                                                                                                                          | Piwi-interacting<br>RNA                                                                 | -                                                                               | 3' UTR   | piRNA<br>precursor<br>intermediate<br>fragment<br>production   | - CLIP, RIP using BG4<br>-Endogenous level<br>of piRNA precursor                                                                      | MOV10L<br>1 | piRNA biogenesis                                                                                                | (58)    |
| Hsa-miR-<br>3620-5p                                                                                                                                                                                                                                                                                                                                                                                                                                                                                                                                                                                                                         | Human miRNA<br>3620-5p                                                                  | -                                                                               | -        | Access of miR-<br>3620-5p to the<br>its mRNA target            | -ESI-MS, CD, NMR,<br>SPR                                                                                                              | N.D.        | miRNA target<br>recognition                                                                                     | (59)    |
| EBNA1                                                                                                                                                                                                                                                                                                                                                                                                                                                                                                                                                                                                                                       | Epstein-Barr virus<br>encoded nuclear<br>antigen 1                                      | Burkitt's<br>lymphoma,<br>Nasopharyngeal<br>carcinoma,<br>Hodgkin's<br>lymphoma | ORF      | Translation<br>repressor                                       | -CD and UV<br>- <i>In vitro</i> translation,<br>metabolic labelling,<br>polysome analysis<br>- G4 ligand:<br>antisense oligos,<br>PDS | N.D.        | Translation inhibition<br>of virally encoded<br>maintenance proteins,<br>affecting antigen<br>presentation (60) | (61)    |
| hTR/TER<br>C                                                                                                                                                                                                                                                                                                                                                                                                                                                                                                                                                                                                                                | Telomerase RNA<br>component                                                             | Dyskeratosis<br>congenita                                                       | 5' end   | G4-duplex<br>competition<br>(62)                               | -Native PAGE<br>-RNA-pull down,<br>EMSA                                                                                               | RHAU        | Template boundary<br>definition in human<br>telomerase                                                          | (63)    |
| hTERT                                                                                                                                                                                                                                                                                                                                                                                                                                                                                                                                                                                                                                       | Human<br>telomerase<br>reverse<br>transcriptase                                         | Cancer                                                                          | Intron 6 | Pre-mRNA<br>Splicing                                           | -Endogenous mRNA<br>expression ( <i>in<br/>cellulo</i> )<br>-G4 ligand 12459                                                          | N.D.        | hTERT splicing<br>controlling telomerase<br>expression                                                          | (64)    |
| TERRA                                                                                                                                                                                                                                                                                                                                                                                                                                                                                                                                                                                                                                       | Telomeric<br>containing RNA                                                             | Cancer                                                                          | -        | -                                                              | -EMSA<br>-CD                                                                                                                          | EWS         | Putative role in<br>telomere homeostasis                                                                        | (65,66) |
|                                                                                                                                                                                                                                                                                                                                                                                                                                                                                                                                                                                                                                             |                                                                                         |                                                                                 | -        | Histone<br>modification of<br>telomeres and<br>telomere length | -                                                                                                                                     | TLS/FUS     | Telomere homeostasis                                                                                            | (67)    |
|                                                                                                                                                                                                                                                                                                                                                                                                                                                                                                                                                                                                                                             |                                                                                         |                                                                                 | -        | TERRA<br>association to<br>telomeric DNA                       | -CD, UV<br>spectroscopy                                                                                                               | TRF2        | Telomere organization                                                                                           | (68)    |
|                                                                                                                                                                                                                                                                                                                                                                                                                                                                                                                                                                                                                                             |                                                                                         |                                                                                 | -        | Repression of<br>innate immune<br>gene expression              | -mRNA expression<br>( <i>in cellulo/in vivo</i> )                                                                                     | N.D.        | Counteracts cancer<br>malignancy                                                                                | (69)    |
| ALS, amyotrophic lateral sclerosis; CD, circular dichroism; CLIP, crosslink immunoprecipitation; DMS, dimethyl sulfate; EMSA, electrophoretic mobility shift assay; ESI-MS, electrospray ionization-mass spectrometry; ESR, surface plasmon resonance; FISH, fluorescence <i>in situ</i> hybridization; FRET, fluorescence resonance energy transfer; FTD, frontotemporal degeneration; FXS, fragile X syndrome; FXTAS, fragile X-associated tremor/ataxia syndrome; IF, immunofluorescence; NMR, nuclear magnetic resonance; PAGE, polyacrylamide gel electrophoresis; RIP, RNA immunoprecipitation; UV, ultraviolet; N.D, non determined. |                                                                                         |                                                                                 |          |                                                                |                                                                                                                                       |             |                                                                                                                 |         |

1. Kumari, S., Bugaut, A., Huppert, J.L. and Balasubramanian, S. (2007) An RNA G-quadruplex in the 5' UTR of the NRAS proto-oncogene modulates translation. *Nat Chem Biol*, **3**, 218-221.
2. Kumari, S., Bugaut, A. and Balasubramanian, S. (2008) Position and stability are determining factors for translation repression by an RNA G-quadruplex-forming sequence within the 5' UTR of the NRAS proto-oncogene. *Biochemistry*, **47**, 12664-12669.
3. Balkwill, G.D., Derecka, K., Garner, T.P., Hodgman, C., Flint, A.P. and Searle, M.S. (2009) Repression of translation of human estrogen receptor alpha by G-quadruplex formation. *Biochemistry*, **48**, 11487-11495.
4. Endoh, T., Kawasaki, Y. and Sugimoto, N. (2013) Stability of RNA quadruplex in open reading frame determines proteolysis of human estrogen receptor alpha. *Nucleic Acids Res*, **41**, 6222-6231.
5. Arora, A., Dutkiewicz, M., Scaria, V., Hariharan, M., Maiti, S. and Kurreck, J. (2008) Inhibition of translation in living eukaryotic cells by an RNA G-quadruplex motif. *RNA*, **14**, 1290-1296.

6. Shahid, R., Bugaut, A. and Balasubramanian, S. (2010) The BCL-2 5' untranslated region contains an RNA G-quadruplex-forming motif that modulates protein expression. *Biochemistry*, **49**, 8300-8306.
7. Gomez, D., Guedin, A., Mergny, J.L., Salles, B., Riou, J.F., Teulade-Fichou, M.P. and Calsou, P. (2010) A G-quadruplex structure within the 5'-UTR of TRF2 mRNA represses translation in human cells. *Nucleic Acids Res*, **38**, 7187-7198.
8. Morris, M.J. and Basu, S. (2009) An unusually stable G-quadruplex within the 5'-UTR of the MT3 matrix metalloproteinase mRNA represses translation in eukaryotic cells. *Biochemistry*, **48**, 5313-5319.
9. Morris, M.J., Wingate, K.L., Silwal, J., Leeper, T.C. and Basu, S. (2012) The porphyrin TmPyP4 unfolds the extremely stable G-quadruplex in MT3-MMP mRNA and alleviates its repressive effect to enhance translation in eukaryotic cells. *Nucleic Acids Res*, **40**, 4137-4145.
10. Lammich, S., Kamp, F., Wagner, J., Nuscher, B., Zilow, S., Ludwig, A.K., Willem, M. and Haass, C. (2011) Translational repression of the disintegrin and metalloprotease ADAM10 by a stable G-quadruplex secondary structure in its 5'-untranslated region. *J Biol Chem*, **286**, 45063-45072.
11. Wolfe, A.L., Singh, K., Zhong, Y., Drewe, P., Rajasekhar, V.K., Sanghvi, V.R., Mavrakis, K.J., Jiang, M., Roderick, J.E., Van der Meulen, J. *et al.* (2014) RNA G-quadruplexes cause eIF4A-dependent oncogene translation in cancer. *Nature*, **513**, 65-70.
12. Weng, H.Y., Huang, H.L., Zhao, P.P., Zhou, H. and Qu, L.H. (2012) Translational repression of cyclin D3 by a stable G-quadruplex in its 5' UTR: implications for cell cycle regulation. *RNA Biol*, **9**, 1099-1109.
13. Agarwala, P., Pandey, S. and Maiti, S. (2014) Role of G-quadruplex located at 5' end of mRNAs. *Biochim Biophys Acta*, **1840**, 3503-3510.
14. Arora, A. and Suess, B. (2011) An RNA G-quadruplex in the 3' UTR of the proto-oncogene PIM1 represses translation. *RNA Biol*, **8**.
15. Bonnal, S., Schaeffer, C., Creancier, L., Clamens, S., Moine, H., Prats, A.C. and Vagner, S. (2003) A single internal ribosome entry site containing a G quartet RNA structure drives fibroblast growth factor 2 gene expression at four alternative translation initiation codons. *J Biol Chem*, **278**, 39330-39336.
16. Morris, M.J., Negishi, Y., Pázsint, C., Schonhoft, J.D. and Basu, S. (2010) An RNA G-quadruplex is essential for cap-independent translation initiation in human VEGF IRES. *J Am Chem Soc*, **132**, 17831-17839.
17. Cammas, A., Dubrac, A., Morel, B., Lamaa, A., Touriol, C., Teulade-Fichou, M.P., Prats, H. and Millevoi, S. (2015) Stabilization of the G-quadruplex at the VEGF IRES represses cap-independent translation. *RNA Biol*, **12**, 320-329.
18. Agarwala, P., Pandey, S., Mapa, K. and Maiti, S. (2013) The G-quadruplex augments translation in the 5' untranslated region of transforming growth factor beta2. *Biochemistry*, **52**, 1528-1538.
19. Castets, M., Schaeffer, C., Bechara, E., Schenck, A., Khandjian, E.W., Luche, S., Moine, H., Rabilloud, T., Mandel, J.L. and Bardoni, B. (2005) FMRP interferes with the Rac1 pathway and controls actin cytoskeleton dynamics in murine fibroblasts. *Hum Mol Genet*, **14**, 835-844.
20. Khateb, S., Weisman-Shomer, P., Hershcó-Shani, I., Ludwig, A.L. and Fry, M. (2007) The tetraplex (CGG)<sub>n</sub> destabilizing proteins hnRNP A2 and CBF-A enhance the in vivo translation of fragile X premutation mRNA. *Nucleic Acids Res*, **35**, 5775-5788.

21. Schaeffer, C., Bardoni, B., Mandel, J.L., Ehresmann, B., Ehresmann, C. and Moine, H. (2001) The fragile X mental retardation protein binds specifically to its mRNA via a purine quartet motif. *EMBO J*, **20**, 4803-4813.
22. Didiot, M.C., Tian, Z., Schaeffer, C., Subramanian, M., Mandel, J.L. and Moine, H. (2008) The G-quartet containing FMRP binding site in FMR1 mRNA is a potent exonic splicing enhancer. *Nucleic Acids Res*, **36**, 4902-4912.
23. Subramanian, M., Rage, F., Tabet, R., Flatter, E., Mandel, J.L. and Moine, H. (2011) G-quadruplex RNA structure as a signal for neurite mRNA targeting. *EMBO Rep*, **12**, 697-704.
24. Muddashetty, R.S., Nalavadi, V.C., Gross, C., Yao, X., Xing, L., Laur, O., Warren, S.T. and Bassell, G.J. (2011) Reversible inhibition of PSD-95 mRNA translation by miR-125a, FMRP phosphorylation, and mGluR signaling. *Mol Cell*, **42**, 673-688.
25. Stefanovic, S., Bassell, G.J. and Mihailescu, M.R. (2015) G quadruplex RNA structures in PSD-95 mRNA: potential regulators of miR-125a seed binding site accessibility. *RNA*, **21**, 48-60.
26. Darnell, J.C., Jensen, K.B., Jin, P., Brown, V., Warren, S.T. and Darnell, R.B. (2001) Fragile X mental retardation protein targets G quartet mRNAs important for neuronal function. *Cell*, **107**, 489-499.
27. Chen, E. and Joseph, S. (2015) Fragile X mental retardation protein: A paradigm for translational control by RNA-binding proteins. *Biochimie*, **114**, 147-154.
28. Stefanovic, S., DeMarco, B.A., Underwood, A., Williams, K.R., Bassell, G.J. and Mihailescu, M.R. (2015) Fragile X mental retardation protein interactions with a G quadruplex structure in the 3'-untranslated region of NR2B mRNA. *Mol Biosyst*, **11**, 3222-3230.
29. Zhang, Y., Gaetano, C.M., Williams, K.R., Bassell, G.J. and Mihailescu, M.R. (2014) FMRP interacts with G-quadruplex structures in the 3'-UTR of its dendritic target Shank1 mRNA. *RNA Biol*, **11**, 1364-1374.
30. Zalfa, F., Giorgi, M., Primerano, B., Moro, A., Di Penta, A., Reis, S., Oostra, B. and Bagni, C. (2003) The fragile X syndrome protein FMRP associates with BC1 RNA and regulates the translation of specific mRNAs at synapses. *Cell*, **112**, 317-327.
31. Lu, R., Wang, H., Liang, Z., Ku, L., O'Donnell W, T., Li, W., Warren, S.T. and Feng, Y. (2004) The fragile X protein controls microtubule-associated protein 1B translation and microtubule stability in brain neuron development. *Proc Natl Acad Sci U S A*, **101**, 15201-15206.
32. Menon, L., Mader, S.A. and Mihailescu, M.R. (2008) Fragile X mental retardation protein interactions with the microtubule associated protein 1B RNA. *RNA*, **14**, 1644-1655.
33. Menon, L. and Mihailescu, M.R. (2007) Interactions of the G quartet forming semaphorin 3F RNA with the RGG box domain of the fragile X protein family. *Nucleic Acids Res*, **35**, 5379-5392.
34. Westmark, C.J. and Malter, J.S. (2007) FMRP mediates mGluR5-dependent translation of amyloid precursor protein. *PLoS Biol*, **5**, e52.
35. Huang, W., Smaldino, P.J., Zhang, Q., Miller, L.D., Cao, P., Stadelman, K., Wan, M., Giri, B., Lei, M., Nagamine, Y. *et al.* (2012) Yin Yang 1 contains G-quadruplex structures in its promoter and 5'-UTR and its expression is modulated by G4 resolvase 1. *Nucleic Acids Res*, **40**, 1033-1049.
36. Booy, E.P., Howard, R., Marushchak, O., Ariyo, E.O., Meier, M., Novakowski, S.K., Deo, S.R., Dzananovic, E., Stetefeld, J. and McKenna, S.A. (2014) The RNA helicase RHAU (DHX36) suppresses expression of the transcription factor PITX1. *Nucleic Acids Res*, **42**, 3346-3361.

37. Cammas, A., Lacroix-Triki, M., Pierredon, S., Le Bras, M., Iacovoni, J.S., Teulade-Fichou, M.P., Favre, G., Roche, H., Filleron, T., Millevoi, S. *et al.* (2016) hnRNP A1-mediated translational regulation of the G quadruplex-containing RON receptor tyrosine kinase mRNA linked to tumor progression. *Oncotarget*, **7**, 16793-16805.
38. Thandapani, P., Song, J., Gandin, V., Cai, Y., Rouleau, S.G., Garant, J.M., Boisvert, F.M., Yu, Z., Perreault, J.P., Topisirovic, I. *et al.* (2015) Aven recognition of RNA G-quadruplexes regulates translation of the mixed lineage leukemia protooncogenes. *Elife*, **4**.
39. Nie, J., Jiang, M., Zhang, X., Tang, H., Jin, H., Huang, X., Yuan, B., Zhang, C., Lai, J.C., Nagamine, Y. *et al.* (2015) Post-transcriptional Regulation of Nkx2-5 by RHAU in Heart Development. *Cell Rep*, **13**, 723-732.
40. Zamiri, B., Reddy, K., Macgregor, R.B., Jr. and Pearson, C.E. (2014) TMPyP4 porphyrin distorts RNA G-quadruplex structures of the disease-associated r(GGGGCC)<sub>n</sub> repeat of the C9orf72 gene and blocks interaction of RNA-binding proteins. *J Biol Chem*, **289**, 4653-4659.
41. Reddy, K., Zamiri, B., Stanley, S.Y., Macgregor, R.B., Jr. and Pearson, C.E. (2013) The disease-associated r(GGGGCC)<sub>n</sub> repeat from the C9orf72 gene forms tract length-dependent uni- and multimolecular RNA G-quadruplex structures. *J Biol Chem*, **288**, 9860-9866.
42. Haeusler, A.R., Donnelly, C.J., Periz, G., Simko, E.A., Shaw, P.G., Kim, M.S., Maragakis, N.J., Troncoso, J.C., Pandey, A., Sattler, R. *et al.* (2014) C9orf72 nucleotide repeat structures initiate molecular cascades of disease. *Nature*, **507**, 195-200.
43. Lee, Y.B., Chen, H.J., Peres, J.N., Gomez-Deza, J., Attig, J., Stalekar, M., Troakes, C., Nishimura, A.L., Scotter, E.L., Vance, C. *et al.* (2013) Hexanucleotide repeats in ALS/FTD form length-dependent RNA foci, sequester RNA binding proteins, and are neurotoxic. *Cell Rep*, **5**, 1178-1186.
44. Cooper-Knock, J., Walsh, M.J., Higginbottom, A., Robin Highley, J., Dickman, M.J., Edbauer, D., Ince, P.G., Wharton, S.B., Wilson, S.A., Kirby, J. *et al.* (2014) Sequestration of multiple RNA recognition motif-containing proteins by C9orf72 repeat expansions. *Brain*, **137**, 2040-2051.
45. Zhang, K., Donnelly, C.J., Haeusler, A.R., Grima, J.C., Machamer, J.B., Steinwald, P., Daley, E.L., Miller, S.J., Cunningham, K.M., Vidensky, S. *et al.* (2015) The C9orf72 repeat expansion disrupts nucleocytoplasmic transport. *Nature*, **525**, 56-61.
46. Ivanov, P., Emara, M.M., Villen, J., Gygi, S.P. and Anderson, P. (2011) Angiogenin-induced tRNA fragments inhibit translation initiation. *Mol Cell*, **43**, 613-623.
47. Ivanov, P., O'Day, E., Emara, M.M., Wagner, G., Lieberman, J. and Anderson, P. (2014) G-quadruplex structures contribute to the neuroprotective effects of angiogenin-induced tRNA fragments. *Proc Natl Acad Sci U S A*, **111**, 18201-18206.
48. Christiansen, J., Kofod, M. and Nielsen, F.C. (1994) A guanosine quadruplex and two stable hairpins flank a major cleavage site in insulin-like growth factor II mRNA. *Nucleic Acids Res*, **22**, 5709-5716.
49. Decorsiere, A., Cayrel, A., Vagner, S. and Millevoi, S. (2011) Essential role for the interaction between hnRNP H/F and a G quadruplex in maintaining p53 pre-mRNA 3'-end processing and function during DNA damage. *Genes Dev*, **25**, 220-225.
50. Marcel, V., Tran, P.L., Sagne, C., Martel-Planche, G., Vaslin, L., Teulade-Fichou, M.P., Hall, J., Mergny, J.L., Hainaut, P. and Van Dyck, E. (2011) G-quadruplex structures in TP53 intron 3: role in alternative splicing and in production of p53 mRNA isoforms. *Carcinogenesis*, **32**, 271-278.



51. Wanrooij, P.H., Uhler, J.P., Simonsson, T., Falkenberg, M. and Gustafsson, C.M. (2010) G-quadruplex structures in RNA stimulate mitochondrial transcription termination and primer formation. *Proc Natl Acad Sci U S A*, **107**, 16072-16077.
52. Beaudoin, J.D. and Perreault, J.P. (2013) Exploring mRNA 3'-UTR G-quadruplexes: evidence of roles in both alternative polyadenylation and mRNA shortening. *Nucleic Acids Res*, **41**, 5898-5911.
53. Fisette, J.F., Montagna, D.R., Mihailescu, M.R. and Wolfe, M.S. (2012) A G-rich element forms a G-quadruplex and regulates BACE1 mRNA alternative splicing. *J Neurochem*, **121**, 763-773.
54. Ribeiro, M.M., Teixeira, G.S., Martins, L., Marques, M.R., de Souza, A.P. and Line, S.R. (2015) G-quadruplex formation enhances splicing efficiency of PAX9 intron 1. *Hum Genet*, **134**, 37-44.
55. Mirihana Arachchilage, G., Dassanayake, A.C. and Basu, S. (2015) A potassium ion-dependent RNA structural switch regulates human pre-miRNA 92b maturation. *Chem Biol*, **22**, 262-272.
56. Zheng, S., Vuong, B.Q., Vaidyanathan, B., Lin, J.Y., Huang, F.T. and Chaudhuri, J. (2015) Non-coding RNA Generated following Lariat Debranching Mediates Targeting of AID to DNA. *Cell*, **161**, 762-773.
57. Beaudoin, J.D. and Perreault, J.P. (2010) 5'-UTR G-quadruplex structures acting as translational repressors. *Nucleic Acids Res*, **38**, 7022-7036.
58. Vourekas, A., Zheng, K., Fu, Q., Maragkakis, M., Alexiou, P., Ma, J., Pillai, R.S., Mourelatos, Z. and Wang, P.J. (2015) The RNA helicase MOV10L1 binds piRNA precursors to initiate piRNA processing. *Genes Dev*, **29**, 617-629.
59. Tan, W., Zhou, J., Gu, J., Xu, M., Xu, X. and Yuan, G. (2016) Probing the G-quadruplex from hsa-miR-3620-5p and inhibition of its interaction with the target sequence. *Talanta*, **154**, 560-566.
60. Tellam, J.T., Zhong, J., Lekieffre, L., Bhat, P., Martinez, M., Croft, N.P., Kaplan, W., Tellam, R.L. and Khanna, R. (2014) mRNA Structural constraints on EBNA1 synthesis impact on in vivo antigen presentation and early priming of CD8+ T cells. *PLoS Pathog*, **10**, e1004423.
61. Murat, P., Zhong, J., Lekieffre, L., Cowieson, N.P., Clancy, J.L., Preiss, T., Balasubramanian, S., Khanna, R. and Tellam, J. (2014) G-quadruplexes regulate Epstein-Barr virus-encoded nuclear antigen 1 mRNA translation. *Nat Chem Biol*, **10**, 358-364.
62. Gros, J., Guedin, A., Mergny, J.L. and Lacroix, L. (2008) G-Quadruplex formation interferes with P1 helix formation in the RNA component of telomerase hTERC. *Chembiochem*, **9**, 2075-2079.
63. Booy, E.P., Meier, M., Okun, N., Novakowski, S.K., Xiong, S., Stetefeld, J. and McKenna, S.A. (2012) The RNA helicase RHAU (DHX36) unwinds a G4-quadruplex in human telomerase RNA and promotes the formation of the P1 helix template boundary. *Nucleic Acids Res*, **40**, 4110-4124.
64. Gomez, D., Lemarteleur, T., Lacroix, L., Mailliet, P., Mergny, J.L. and Riou, J.F. (2004) Telomerase downregulation induced by the G-quadruplex ligand 12459 in A549 cells is mediated by hTERT RNA alternative splicing. *Nucleic Acids Res*, **32**, 371-379.
65. Takahama, K., Kino, K., Arai, S., Kurokawa, R. and Oyoshi, T. (2011) Identification of Ewing's sarcoma protein as a G-quadruplex DNA- and RNA-binding protein. *FEBS J*, **278**, 988-998.

66. Takahama, K., Sugimoto, C., Arai, S., Kurokawa, R. and Oyoshi, T. (2011) Loop lengths of G-quadruplex structures affect the G-quadruplex DNA binding selectivity of the RGG motif in Ewing's sarcoma. *Biochemistry*, **50**, 5369-5378.
67. Takahama, K., Takada, A., Tada, S., Shimizu, M., Sayama, K., Kurokawa, R. and Oyoshi, T. (2013) Regulation of telomere length by G-quadruplex telomere DNA- and TERRA-binding protein TLS/FUS. *Chem Biol*, **20**, 341-350.
68. Biffi, G., Tannahill, D. and Balasubramanian, S. (2012) An intramolecular G-quadruplex structure is required for binding of telomeric repeat-containing RNA to the telomeric protein TRF2. *J Am Chem Soc*, **134**, 11974-11976.
69. Hirashima, K. and Seimiya, H. (2015) Telomeric repeat-containing RNA/G-quadruplex-forming sequences cause genome-wide alteration of gene expression in human cancer cells in vivo. *Nucleic Acids Res*, **43**, 2022-2032.
